# Supplementary material for: How harbour seals (Phoca vitulina) encode goals relative to landmarks
Source: Oxford University Press journal article supplement (doi:10.1242/jeb.243870), 2022-01-31
Supplement: jeb243870supp.pdf [file jeb243870supp.pdf]

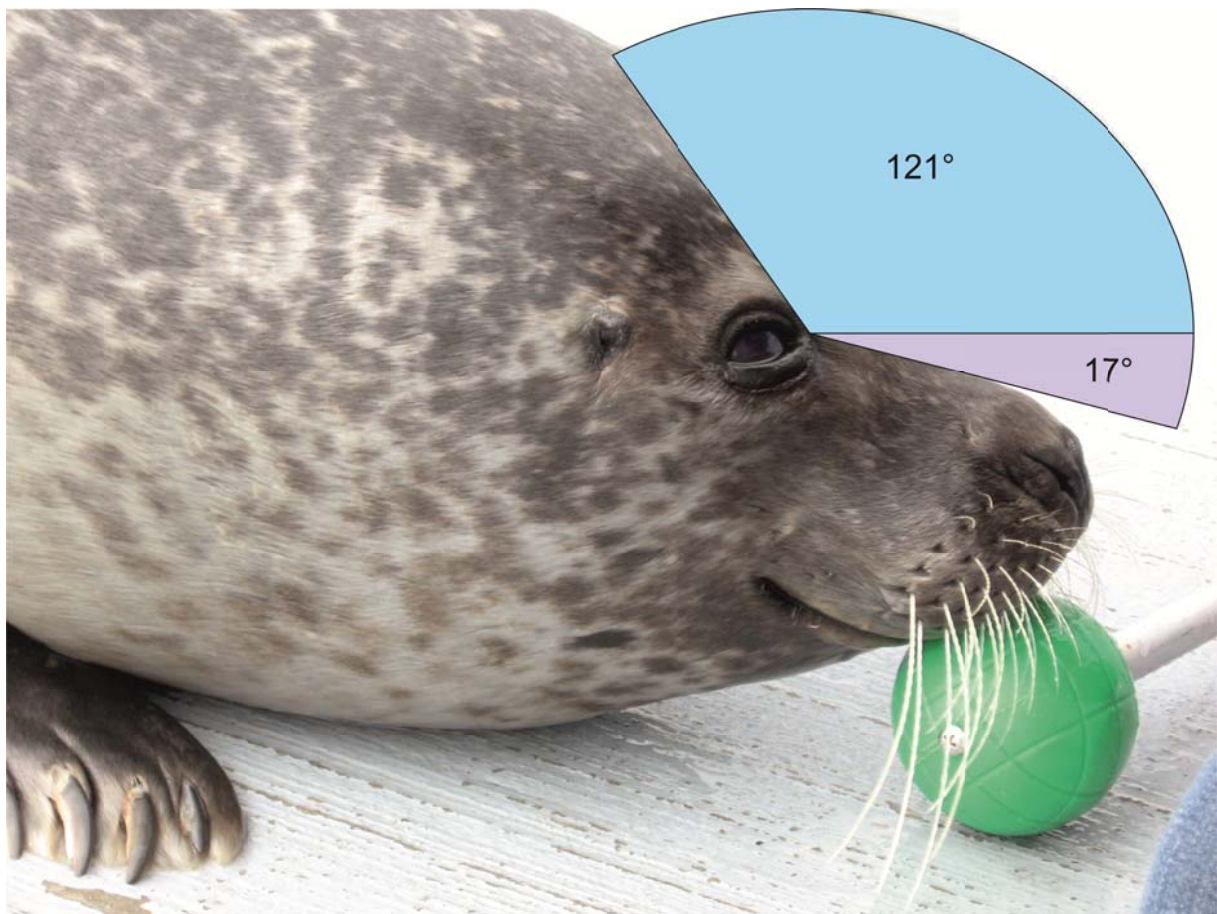

**Fig. S1.** Dynamic visual field of a harbor seal. Harbor seals have a large dorsal but only small ventral dynamic visual field. When eye movements are prohibited, the dorsal visual field is still extending over 69 deg. The ventral visual field is reduced to 12 deg without eye movements (data taken from Hanke et al. 2006)
